# Supplementary material for: From Science to Politics: COVID-19 Information Fatigue on YouTube
Source: Research Square preprint supplement (doi:10.21203/rs.3.rs-1209529/v1), 2022-01-18
Supplement: Supplementary file 1 [file 65d3989892bb93ffcf9984c7.docx]

Supplementary material for A shift from science to politics : a content analysis of COVID-19 Videos on YouTube

Table 5: Coding themes. The theme usually appears right at the beginning of a video and on the headline and continues through the content. A theme is considered salient (coded as the main theme of a given video) when a video devotes more time to that theme than to others.

| **Theme** | **Explanation** |
| --- | --- |
| Virus Information | *The characteristics, natural history, symptoms, severity of disease, transmission, and epidemiological explanations of the coronavirus.* |
| Statistics, and Modeling | *The course of the pandemics, case, deaths, and hospitalization rates, supply of medical resources, and modelling predictions.* |
| Treatment | *Providing, evaluating, discussing, and suggesting methods of treatment for coronavirus patients, including information about what to do if suspicious of infection.* |
| Prevention and Action | *Discussion of prevention and control measures, whether as a policy or an option. Subcodes include: Lockdown and Reopening, Mask, Vaccine, Social distancing, Testing, contact tracing and sanitation, and Other.* |
| Impacts on Non-Physical Health Related Issues | *Broader social scale social of impacts of the coronavirus, including anxiety and mental health issues, socialization, daily basic resources, and personal worries.* |
| Impacts on Economy | *Effects on business and on economic growth, relief packages, unemployment, stock performance, etc.* |
| Politics and Blame | *Discussion around the politics of coronavirus, often to do with who is to blame (At fault) for causing the virus, and/or prevention/action measures or lack thereof.* |
| Other: International Cooperation | *Cooperation and coordination by WHO and among nations, and humanitarian support.* |
| Human Interest | *Personal/community stories related to people’s experiences during the pandemic. On a personal/individual/community level, rather than focusing on larger systemic issues.* |
| Other: Side Story | *For videos that mention COVID- briefly but not a main subject – only as a marginal point.* |
| Other | *None of the above.* |
