# Supplementary material for: From Science to Politics: COVID-19 Information Fatigue on YouTube
Source: Research Square preprint supplement (doi:10.21203/rs.3.rs-1209529/v1), 2022-01-18
Supplement: Supplementary file 2 [file 9350fa2ddeb88f41c750b073.docx]

Supplementary material for A shift from science to politics : a content analysis of COVID-19 Videos on YouTube

Table 6: All types of sources identified and coded.

| **Source Type** | **Explanation** |
| --- | --- |
| Straight News Outlet | Conventional/mainstream news media including newspapers, TV network, online news website. Outlet tends to produce journalistic-style videos, news broadcasts and interviews. |
| Entertainment News | Outlet reports news from an entertainment-based program; content made professionally, but not journalistic in style. |
| Public Health Authorities: Governments | Outlet provides news from governmental bodies and government agencies like regional health departments, (e.g., PHAC, CDC) |
| Public Health Authorities: WHO | Outlet for WHO news conferences, or presentations by WHO officials, or researchers on behalf of WHO. |
| Educational Groups | Outlet creates content by educational groups, academic institutions or hospitals; a verified non-governmental organization/charity that is providing information about the coronavirus. |
| Youtubers: Professional | Individual or group with medical credentials. |
| Youtubers: Layperson | Individual or group with no medical/public health credentials or medical/public health affiliation. |
